# Supplementary material for: Higher Body Mass Index Increases the Risk for Biopsy-Mediated Detection of Prostate Cancer in Chinese Men
Source: PubMed Central journal article supplement (PMC4393292; doi:10.1371/journal.pone.0124668), 2015-04-10
Supplement: pone.0124668.s001.pdf [file pone.0124668.s001.pdf]

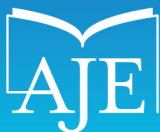

# EDITORIAL CERTIFICATE

This document certifies that the manuscript listed below was edited for proper English language, grammar, punctuation, spelling, and overall style by one or more of the highly qualified native English speaking editors at American Journal Experts.

## Manuscript title:

U-shaped relation between body mass index and biopsy mediated detection of prostate cancer in Chinese men

## Authors:

Meng-Bo Hu, Pei-De Bai, Yi-Shuo Wu, Li-Min Zhang, Hua Xu, Rong Na, Hao-Wen Jiang, Qiang Ding

## Date Issued:

October 28, 2014

## Certificate Verification Key:

50F7-ABDB-7E39-76D3-60C8

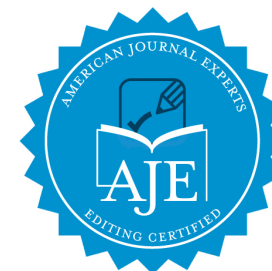

This certificate may be verified at [www.aje.com/certificate](http://www.aje.com/certificate). This document certifies that the manuscript listed above was edited for proper English language, grammar, punctuation, spelling, and overall style by one or more of the highly qualified native English speaking editors at American Journal Experts. Neither the research content nor the authors' intentions were altered in any way during the editing process. Documents receiving this certification should be English-ready for publication; however, the author has the ability to accept or reject our suggestions and changes. To verify the final AJE edited version, please visit our verification page. If you have any questions or concerns about this edited document, please contact American Journal Experts at [support@aje.com](mailto:support@aje.com).
